# Supplementary material for: Bone morphogenetic protein 2 induces pulmonary angiogenesis via Wnt–β-catenin and Wnt–RhoA–Rac1 pathways
Source: PubMed Central journal article supplement — J Cell Biol. 2009 Jan 12;184(1):83–99. doi: 10.1083/jcb.200806049 (PMC2615088; doi:10.1083/jcb.200806049), 2009-01-12
Supplement: jcb.200806049_5.pdf [file jcb.200806049_5.pdf]

de Jesus Perez et al., <http://www.jcb.org/cgi/content/full/jcb.200806049/DC1>

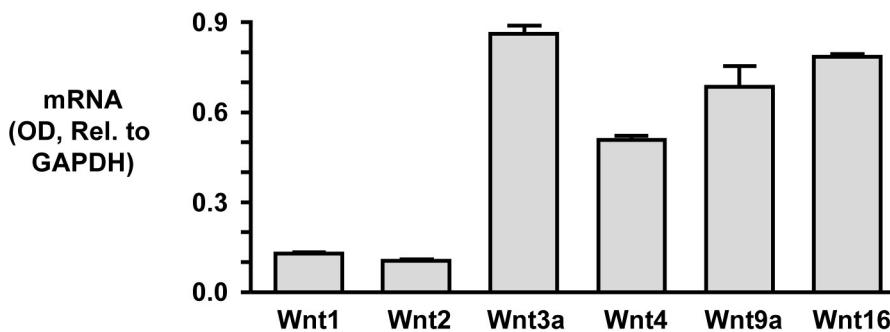

mRNA was undetectable for Wnts 2b, 3, 4b, 5a, 5b, 6, 7a, 7b, 7c, 8a, 8b, 9b, 10a, 10b, and 11.

Figure S1. **Semiquantitative RT-PCR profile of Wnt genes in hPAECs.** Total RNA from unstimulated hPAECs was extracted and transcribed into cDNA followed by PCR reaction using primers against all known human Wnt genes. Values were normalized to levels of glyceraldehyde 3-phosphate dehydrogenase (GAPDH). Error bars denote mean  $\pm$  SEM for three different experiments with triplicate assessments.

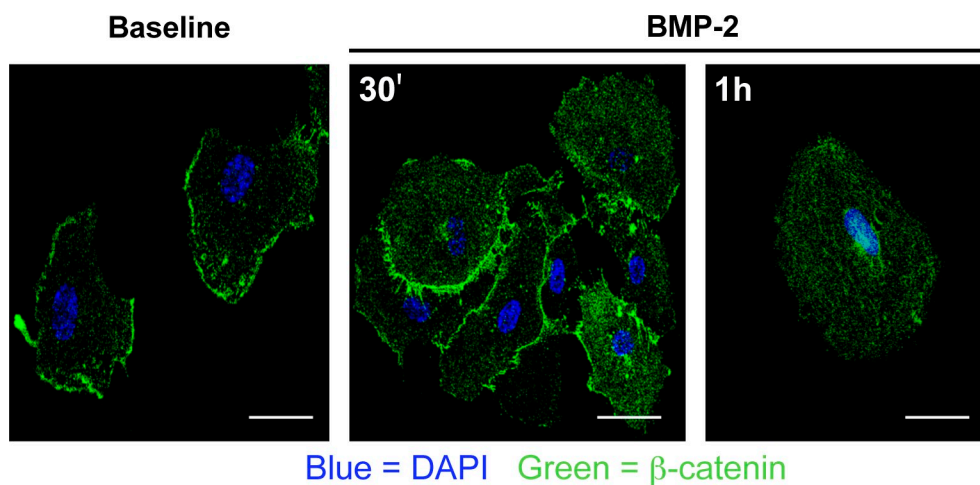

Figure S2. **BMP-2 induces nuclear accumulation of  $\beta$ -C in hPAECs.** Confocal images of hPAECs stimulated with 10 ng/ml BMP-2 for 1 h. After fixation and permeabilization, samples were incubated with primary antibody specific for  $\beta$ -C followed by the addition of Alexa Fluor 488-labeled secondary antibody (green) and DAPI (blue). Bars, 10  $\mu$ m.

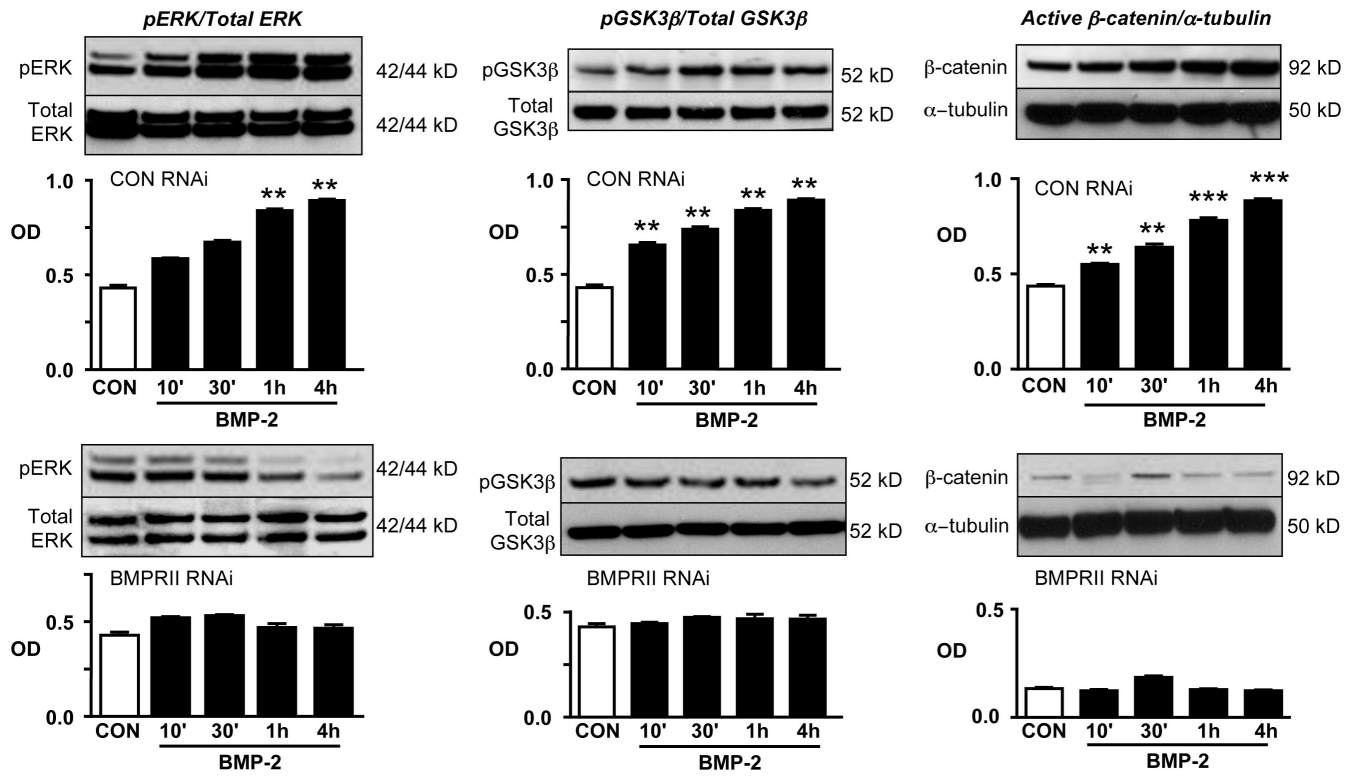

Figure S3. **BMPRII knockdown abrogates the ERK1/2-mediated response in BMP-2-stimulated hPAECs.** Western immunoblots of hPAECs nucleofected with nontargeting and BMP2 siRNA. Membranes were probed for pERK1/2, total ERK1/2, phosphorylated and total GSK3-β, β-C, and α-tubulin. Error bars denote mean ± SEM for three different experiments performed in triplicate. \*\*, P < 0.001 and \*\*\*, P < 0.0001 (vs. control [CON]).

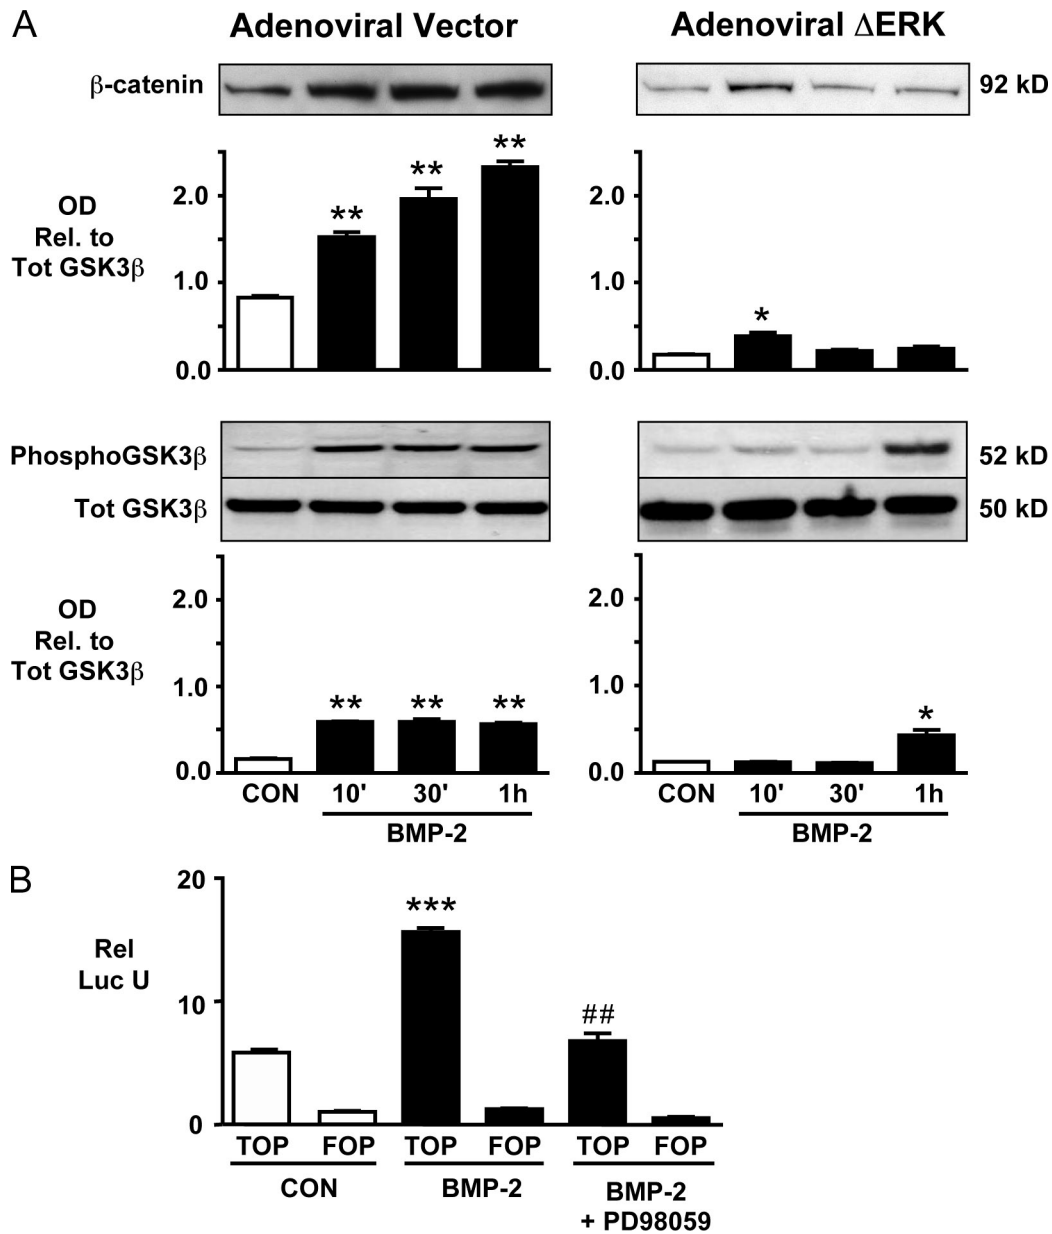

Figure S4. **Loss of BMP-2-mediated  $\beta$ -C accumulation and transcriptional activity in the presence of dominant-negative ERK.** (A) Transfection of dominant-negative ERK ( $\Delta$ ERK) prevents BMP-2-induced accumulation of  $\beta$ -C. Western Immunoblots of hPAECs transfected with adenovirus carrying either an empty plasmid or  $\Delta$ ERK construct followed by stimulation with 10 ng/ml BMP-2 for a period of 1 h. Immunoblots were probed for  $\beta$ -C and phosphorylated and total GSK3- $\beta$ . Values were normalized to total GSK3- $\beta$ . \*,  $P < 0.01$  and \*\*,  $P < 0.001$  [vs. control [CON]]. (B) BMP-2-mediated TOPflash activity is reduced in the presence of PD98059. TOPflash activity as described in Fig. 1, with FOPflash as a negative control. Cells were starved for 24 h and stimulated with BMP-2 in the presence or absence of PD98059 as described in Fig. 4 A. \*\*\*,  $P < 0.0001$  (vs. control TOPflash); ##,  $P < 0.001$  (vs. BMP-2/TOPflash). Error bars denote mean  $\pm$  SEM for three different experiments with triplicate assessments.

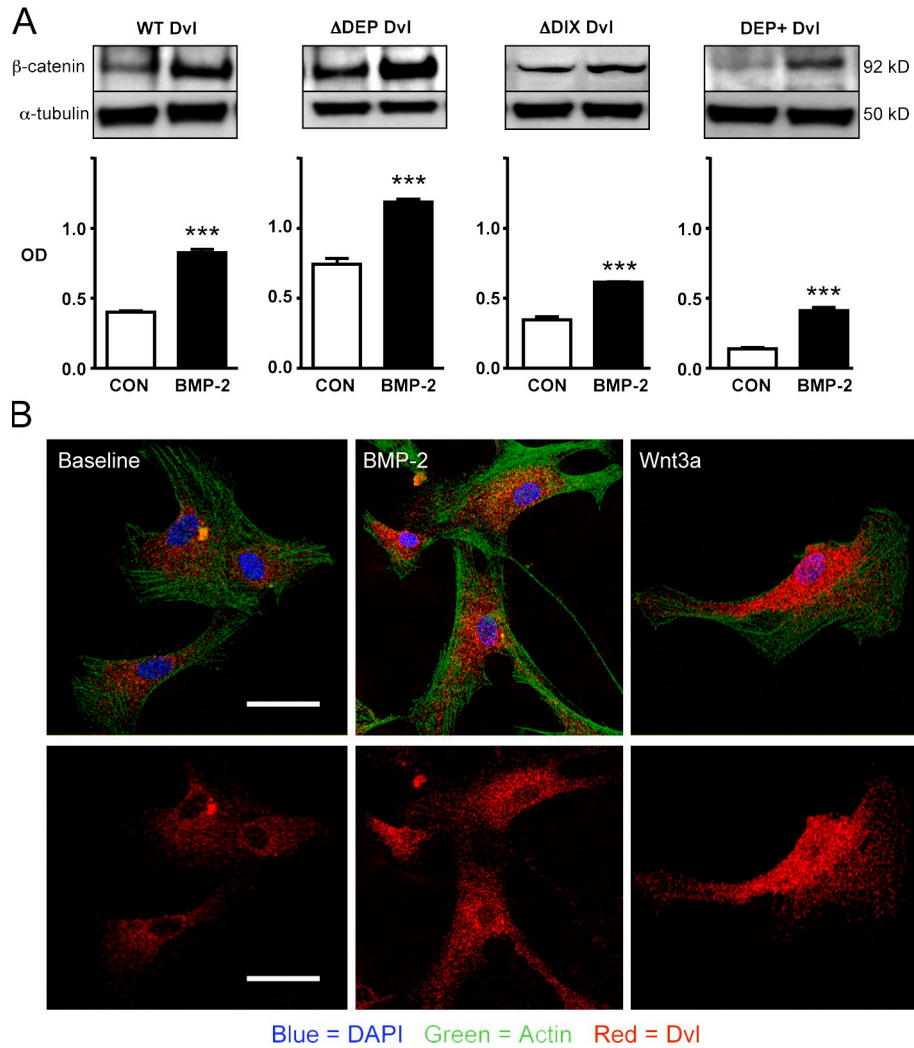

Figure S5. **The lack of impact of the Dvl mutant constructs on BMP-mediated  $\beta$ -C accumulation and the peripheral redistribution of Dvl in BMP-2- or Wnt3a-stimulated PAECs.** (A) Transfection of the various Dvl constructs does not interfere with BMP-2-induced accumulation of  $\beta$ -C in hPAECs. Immunoblots were probed for  $\beta$ -C and  $\alpha$ -tubulin. Values were normalized to tubulin. Error bars denote mean  $\pm$  SEM for three different experiments with triplicate assessments. \*\*\*,  $P < 0.0001$  (vs. control [CON]). (B) Endogenous Dvl is redistributed to the cell periphery under BMP-2 stimulation. Confocal images of hPAECs stimulated with 10 ng/ml BMP-2 or 100 ng/ml Wnt3a for 4 h. Dvl is labeled red, actin is labeled green, and nuclei are labeled blue. A combined (top) and single channel (bottom) collection of images illustrating the distribution of Dvl (red) is shown. Bars, 10  $\mu$ m.
